# Supplementary material for: Association of Autistic-Like and Internalizing Traits During Childhood: A Longitudinal Twin Study
Source: Atypon-hosted journal article supplement (doi:10.1176/appi.ajp.2009.09070990), 2010-05-18
Supplement: ajp_167_07_809_01.pdf [file ajp_167_07_809_01.pdf]

**Supplementary material: Decomposing the variance of internalizing and autistic-like traits at 12 years**

This table summarizes how much of the phenotypic variance of a variable at t2 is attributable to the same trait at t1 (stability effects), the other trait at t1 (cross-lagged effects), the covariance between the traits at t1 or effects specific to t2 (residual effects). This is then broken down into the contributions of A, C and E.

**Internalizing traits at 12 years**

| Proportion of variance due to:                   | Total Phenotypic variance | Decomposing the phenotypic variance into A,C,E variances (males / females) |               |               |
|--------------------------------------------------|---------------------------|----------------------------------------------------------------------------|---------------|---------------|
|                                                  |                           | A                                                                          | C             | E             |
|                                                  | 1.0                       |                                                                            |               |               |
| Internalizing traits at t1: Stability effects    | 0.13 / 0.14               | 0.06 / 0.08                                                                | 0.02 / 0.02   | 0.05 / 0.05   |
| Autistic-like traits at t1: Cross-lagged effects | 0.03 / 0.01               | 0.02 / 0.01                                                                | 0.001 / 0.001 | 0.004 / 0.002 |
| Common effects at t1                             | 0.02 / 0.02               | 0.01 / 0.01                                                                | 0.01 / 0.01   | 0.002 / 0.002 |
| Residual effects at t2                           | 0.82 / 0.83               | 0.40 / 0.36                                                                | 0.05 / 0.10   | 0.36 / 0.36   |

**Autistic-like traits at 12 years:**

| Proportion of variance due to:                   | Total Phenotypic variance | Decomposing the phenotypic variance into A,C,E variances (males / females) |               |               |
|--------------------------------------------------|---------------------------|----------------------------------------------------------------------------|---------------|---------------|
|                                                  |                           | A                                                                          | C             | E             |
|                                                  | 1.0                       |                                                                            |               |               |
| Autistic-like traits at t1: Stability effects    | 0.32 / 0.28               | 0.23 / 0.19                                                                | 0.02 / 0.05   | 0.06 / 0.05   |
| Internalizing traits at t1: Cross-lagged effects | 0.01 / 0.003              | 0.002 / 0.002                                                              | 0.001 / 0.001 | 0.001 / 0.001 |
| Common effects at t1                             | 0.02 / 0.02               | 0.007 / 0.006                                                              | 0.01 / 0.01   | 0.002 / 0.001 |
| Residual effects at t2                           | 0.65 / 0.70               | 0.41 / 0.32                                                                | 0.04 / 0.15   | 0.23 / 0.22   |

A: Additive genetic factors, C: Shared environmental factors, E : nonshared environmental factors. t1: time point 1 (age 7/8); t2: time point 2 (age 12).
